# Supplementary material for: Target and non-target screening strategies for organic contaminants, residues and illicit substances in food, environmental and human biological samples by UHPLC-QTOF-MS
Source: Royal Society of Chemistry journal article supplement (doi:10.1039/c1ay05385j), 2011-11-28
Supplement: c1ay05385j.pdf [file c1ay05385j.pdf]

SUPPLEMENTARY INFORMATION

Table 3: Analytes included in the post-target and the non-target with theoretical library screening in **positive ESI mode** grouped by compounds family.

**A) List of Pesticides included.**

|                                       |                                      |                            |                         |
|---------------------------------------|--------------------------------------|----------------------------|-------------------------|
| 1-Naphtalene acetamide                | Cyanofenphos oxygen                  | Flamprop methyl            | Pencycuron              |
| 1-Naphthaleneacetic acid              | Cycloate                             | Flazasulfuron              | Pendimethalin           |
| 2,4,5-T                               | cycloheximide                        | Florasulam                 | Penxoxazole             |
| 2,4,5-T Isopropyl ester               | Cyfluthrin                           | Fluacrypyrim               | Phenmedipham            |
| 2,4-D                                 | Cymoxanil                            | Fluazifop acid             | Phenoxyacetic acid      |
| 2,4-D Butyl ester                     | Cyprodinil                           | Fluazifop-P-butyl          | Phenyl mercuric acetate |
| 2,4-D isopropyl ester                 | Cyproconazole                        | Flucythrinate              | Phorate                 |
| 2,4-D methyl ester                    | Cyromazine                           | Fludioxonil                | Phorate oxygen analogue |
| 2-aminobenzimidazol                   | Dacthal                              | Flufenacet                 | Phorate sulfoxide       |
| 2-hydroxy-simazine                    | Daminozide                           | Flufenoxuron               | Phorate-sulfone         |
| 2-hydroxy-terbuthylazine              | Dazomet                              | Fluometuron                | Phosalone               |
| 2-Naphtoxyacetic acid                 | DDVP (dichlorvos)                    | Fluquinconazole            | Phosfon                 |
| 2-phenoxypropionic acid               | Deethyl ametryn                      | Fluridone                  | Phosmet                 |
| 3,4,5-trimethacarb                    | Deethyl cyanazine                    | Fluroxypyr                 | Phosphamidon            |
| 3,4-Dichloraniline                    | Deethyl cyanazine acid               | Flurtamone                 | Phoxim                  |
| 5-hydroxy-imidacloprid                | Deethyl cyanazine amide              | Flusilazole                | Picolinafen             |
| 5-OH-clethodim-sulfon                 | Deethyl terbuthylazine               | Flutriafol                 | Pirimicarb              |
| 6-chloro-4-hydroxy-3-phenyl-pyridazin | Deethyl-2-hydroxy-terbuthylazine     | Folpet                     | Pirimiphos ethyl        |
| 8-hydroxyquinoline                    | Deethylatrazine                      | Fonofos                    | Pirimiphos-methyl       |
| Absidic acid                          | Deethyldeisopropyl-2-hydroxyatrazine | Forchlorfenuron            | Primisulfuron-methyl    |
| ACC                                   | Deethylhydroxyatrazine               | Fosmet                     | Prochloraz              |
| Acephate                              | Deethylsymetrine                     | Fosthiazate                | Prochloraz              |
| Acetamiprid                           | Deethylterbumeton                    | Fuberidazole               | Procymidone             |
| Acetate                               | Deethylterbutryn                     | Furathiocarb               | Profenofos              |
| Acetochlor                            | Deisopropyl-2-hydroxy-atrazine       | Gibberellic acid           | Promecarb               |
| Acibenzolar-S-methyl                  | Deisopropylatrazine                  | Haloxypop                  | Prometon                |
| Aclonifen                             | Deisopropylprometryne                | Haloxypop-ethoxyethyl      | Prometryne              |
| Acrinathrin                           | Deltamethrin                         | Haloxypop-ethoxyethylester | Propachlor              |

|                    |                              |                                        |                        |
|--------------------|------------------------------|----------------------------------------|------------------------|
| Alachlor           | Demethon-S-methyl            | Haloxyfop-etotyl                       | Propamocarb            |
| Alanycarb          | Demethon-S-methyl sulfon     | Haloxyfop-methyl                       | Propanil               |
| Albendazole        | Demethon-S-methyl sulfoxide  | Heptenophos                            | Propargite             |
| Aldicarb           | Demethyl fluometuron         | Hexaconazole                           | Propethamphos          |
| Aldicarb sulfoxide | Demethyl isoproturon         | Hexazinone                             | Propham                |
| Aldicarb sulphone  | Demethyl monuron             | Hexythiazox                            | Propiconazole          |
| Ametryne           | Desmedipham                  | Hormodin                               | Propoxur               |
| Amidosulfuron      | Desmethylpyrimicarb          | Hydroxy atrazine                       | Propyzamide            |
| Aminocarb          | Diafenthuron                 | Imazalil                               | Prosulfuron            |
| Amitraz            | Dialifos                     | Imazameth                              | Prosulfuron            |
| Anilazine          | Diallate                     | Imazamethabenz-methyl                  | Prothiophos            |
| Anilofos           | Diazinon                     | Imidacloprid                           | Pymetrozine            |
| ANTU               | Dibenzylamine                | Indoxacarb                             | Pyrazophos             |
| Atrazine           | Dichlofluanid                | Iprodione                              | Pyridaben              |
| Avermectin B1a     | Dichlone                     | Iprodione desisopropyl<br>(metabolite) | Pyridaphenthion        |
| Avermectin B1b     | Dichlorprop                  | Iprovalicarb                           | Pyridate               |
| Azamethiphos       | Diclobutrazol                | Isazofos                               | Pyrifenox isomer Z/E 1 |
| Azinphos-ethyl     | Diclofop-methyl              | Isofenphos                             | Pyrifenox isomer Z/E 2 |
| Azinphos-methyl    | Dicloran                     | Isoproturon                            | Pyrimethanil           |
| Azoxystrobin       | Dicrotophos                  | Isoxaflutole                           | Pyriproxyfen           |
| Benalaxyl          | Dicryl                       | Isoxathion                             | Quinalphos             |
| Bendiocarb         | Dieldrin                     | Kresoxim-methyl                        | Quinmerac              |
| Benfuracarb        | Diethofencarb                | Linuron                                | Quinoclamine           |
| Bensulfuron-methyl | Difenoconazole               | Lufenuron                              | Quinoxyfen             |
| Bensulide          | Difenoxuron                  | Malaoxon                               | Quizalofop-ethyl       |
| Bensultap          | Diflubenzuron                | Malathion                              | Reserpine              |
| Bentazone          | Di flufenican                | MCPA                                   | Rimsulfuron            |
| Benzoximate        | Disulfoton                   | MCPA methylester                       | Rotenone               |
| Bifenazate         | Dimefuron                    | Mecarbam                               | Silvex                 |
| Bifenox            | Dimethachlor                 | Mepanipyrim                            | Simazine               |
| Bifenthrin         | Dimethoate                   | Merphos                                | Simetryn               |
| Bitertanol         | Dimethomorph estereoisomer 1 | Mesotrione                             | Spinosyn A             |
| Bromacil           | Dimethomorph estereoisomer 2 | Metalaxyl                              | Spinosyn D             |
| Bromoxynil         | Dimethylvinphos              | Metamitron                             | Spiroxamine            |

|                              |                              |                          |                       |
|------------------------------|------------------------------|--------------------------|-----------------------|
| Bromuconazole                | Diniconazole                 | Metazachlor              | Strychnine            |
| Bupirimate                   | Dinocap                      | Metconazole              | Sulfallate            |
| Buprofezin                   | Diphacinone                  | Methabenzthiazuron       | Sulfosulfuron         |
| Butocarboxym                 | Diphenylamine                | Methamidophos            | Sulfotep              |
| Butoxycarboxim-sulfoxid (FC) | Diquat dibromide monohydrate | Methfuroxam              | Sulprofos             |
| Butoxycarboxym               | Diuron                       | Methidathion             | Tebuconazole          |
| Buturon                      | Dixanthogen                  | Methiocarb               | Tebufenozide          |
| Cambendazole                 | Dodemorph                    | Methiocarb sulfone       | Tebufenpyrad          |
| Captan                       | Dodine                       | Methiocarb sulfoxide     | Tebuthiuron           |
| Carbaryl                     | Edifenphos                   | Methomyl                 | Teflubenzuron         |
| Carbendazim                  | Endrin                       | Methoxyfenozide          | Terbacil              |
| Carbetamide                  | EPN                          | Metobromuron             | Terbufos              |
| Carbofuran                   | Epoxiconazole                | Metolachlor              | Terbufos sulfone      |
| Carbofuran-3-OH              | EPTC                         | Metosulam                | Terbufos sulfoxide    |
| Carbosulfan                  | Ethephon                     | Metoxuron                | Terbumeton            |
| Carboxin                     | Ethiofencarb                 | Metribuzin               | Terbuthylazine        |
| Chlorbromuron                | Ethiofencarb sulfone         | Metsulfuron-methyl       | Terbutryn             |
| Chlorfenapyr                 | Ethiofencarb sulfoxide       | Mevinphos 1              | Tetrachlorvinphos     |
| Chlorfenvinphos              | Ethiofencarbsulfon           | Mevinphos 2              | Tetraconazole         |
| Chlorfenvinphos-Met          | Ethion                       | Molinate                 | Thiabendazole         |
| Chlorfluazuron               | Ethiprole                    | Monocrotophos            | Thiacloprid           |
| Chloridazon                  | Ethoxyquin                   | Monolinuron              | Thiamethoxam          |
| Chlorophenoxyacetic acid     | Ethofenprox                  | Monuron                  | Thifensulfuron-methyl |
| Chloropicrin                 | Ethofumesate                 | Myclobutanil             | Thiobencarb           |
| Chlorotoluron                | Ethoprophos                  | Naled                    | Thiodicarb            |
| Chloroxuron                  | Etoxazole                    | Napropamide              | Thiofanox             |
| Chlorpropham                 | Etrimfos                     | Neburon                  | Thiofanox-sulfone     |
| Chlorsulfuron                | Famoxadone                   | Nicosulfuron             | Thiofanox-sulfoxide   |
| Chromafenozide               | Fenamiphos                   | Nicotine                 | Thiophanate-ethyl     |
| Cinosulfuron                 | Fenarimol                    | N-m-Tolylphthalamic acid | Thiophanate-methyl    |
| Clethodim                    | Fenazaquin                   | Nuarimol                 | Thiram                |
| Clethodim-imin-sulfon        | Fenbendazole                 | Ofurace                  | Tolclofos-methyl      |
| Clethodim-imin-sulfoxide     | Fenbuconazole                | Omethoate                | Tolylfluanid          |
| Clethodim-sulfon             | Fenfuram                     | Oxamide                  | Triadimefon           |
| Clethodim-sulfoxid           | Fenhexamid                   | Oxadixyl                 | Triadimenol           |

|                      |                       |                     |                    |
|----------------------|-----------------------|---------------------|--------------------|
| Clodinafop-propargyl | Fenoxaprop            | Oxamyl              | Triasulfuron       |
| Clofentezine         | Fenoxaprop-ethyl      | Oxycarboxin         | Triazophos         |
| Clomazone            | Fenoxycarb            | Oxydemeton-methyl   | Tribenuron-methyl  |
| Clopyralid           | Fenpiclonil           | Oxyfluorfen         | Trichlorfon        |
| Cloquintocet-mexyl   | Fenpropathrin         | Oxygen              | Tricyclazole       |
| Clorpyrifos          | Fenpropidin           | Paclobutrazol       | Trietazine         |
| Clorpyrifos-methyl   | Fenpropimorph         | Paraoxon            | Trifloxystrobin    |
| Clothianidin         | Fenpyroximate         | Paraoxon-methyl     | Triflumizole       |
| Coroxon              | Fensulfothion         | Paraquat dichloride | Triflumuron        |
| Coumaphos            | Fensulfothion-sulfone | Parathion           | Trifluralin        |
| Cyanazine            | Fenthion              | Parathion-methyl    | Trisulfuron-methyl |
| Cyanazine acid       | Fenuron               | Parathion-ethyl     | Triticonazole      |
| Cyanazine amide      | Flamprop              | Pebulate            | Vamidothion        |
| Cyanofenphos         | Flamprop isopropyl    | Penconazole         | Vinclozolin        |

**B) List of Pharmaceuticals included.**

|                               |                         |                                      |                                        |
|-------------------------------|-------------------------|--------------------------------------|----------------------------------------|
| Aceclofenac                   | Cimaterol               | Hydroxymethylclenbuterol             | Papaverine                             |
| Acetobutolol                  | Cimbuterol              | Ibuprofen                            | Paracetamol/Acetaminophen              |
| Acetazolamide                 | Cimetidine              | Ibuprofen (Met 1) Carboxyibuprofen   | Paroxetine                             |
| Acetylsalicylic acid/Aspirine | Ciproheptadina          | Ibuprofen (Met 1) Hydroxyibuprofen   | Pavabid                                |
| Adrafinil                     | Citalopram              | Ifosfamide                           | Pentoxifylline                         |
| Albuterol                     | Clenbuterol             | Indomethacin                         | Phenazone/Antipyrine                   |
| Aldosterone                   | Clencyclohexerol        | Iopamidol                            | Phenylbutazone                         |
| Alendronic acid               | Clenhepterol            | Iopromide                            | Phenylbutazone (Met 1) Oxyphenbutazone |
| Alprazolam                    | Clenhexerol             | Irbesartan                           | hydroxylated Phenylbutazone (Met 2)    |
| Amfepramone                   | Clenisopenterol         | Isoprenaline                         | Phenylthiouracil                       |
| Amiloride                     | Clenpenterol            | Isoxsuprine                          | Pindolol                               |
| Aminoglutethimide             | Clenproperol            | Ketoprofen                           | Pirbuterol                             |
| Amiphenazole                  | Clobetasol propionate   | Lansoprazole                         | Pravastatin                            |
| Anastrozole                   | Clobetasone butryate    | Latanoprost                          | Prednisolone                           |
| Bendroflumethiazide           | Clofibrate              | Loratadine                           | Prednisone                             |
| Benzylpiperazine              | Clofibric acid          | Lorazepam                            | Procaterol                             |
| Bumetanide                    | Clopidogrel             | Lorazepam glucuronide                | Propranolol                            |
| Bupropion                     | Codeine                 | Mabuterol                            | Propylthiouracil                       |
| Canrenone                     | Cortisol/Hydrocortisone | Mahexerol                            | Propyphenazone                         |
| Carphedon                     | Cortisone               | Mapenterol                           | Quinapril                              |
| Carteolol                     | Cyclophosphamide        | Mefenamic acid                       | Ractopamine                            |
| Cathine                       | Desoxycortisone         | Meloxicam                            | Raloxifene                             |
| Celiprolol                    | Dexamethasone           | Mercaptobenzimidazol                 | Ramipril                               |
| Amfetaminil                   | Diatrizoate             | Mestranol                            | Ranitidine                             |
| Chlorothiazide                | Diazepam                | Metamizole (Met 1) 4-Aminoantipyrine | Reproterol                             |
| Chlorphentermine              | Diclofenac              | Metamizole/Dypirone                  | Risedronic acid                        |
| Chlorthalidone                | Diltiazem               | Metaprotenerol                       | Risperidone                            |
| Amidotrizoic acid             | Dimethylaminophenazone  | Methotrexate                         | Salbutamol                             |
| Amitriptyline                 | Donepezil               | Methylprednisolone                   | Salicylic acid                         |
| Amlodipine                    | Doxazosine              | Methylprednisone                     | Salmeterol                             |
| Astemizol                     | Enalapril               | Methylthiouracil                     | Sertralina                             |
| Atenolol                      | Etofibrate              | Metoprolol                           | Simvastatin                            |

|                    |                             |                                 |                         |
|--------------------|-----------------------------|---------------------------------|-------------------------|
| Atorvastatin       | Famotidine                  | Metrapolol                      | Sotalol                 |
| Bamethane          | Fenofibric acid/Fenofibrate | Mevastatin                      | Sulfapyridine           |
| Beclomethasone     | Fenoprofen                  | Mizolastine                     | Tamsulosin              |
| Benzafibrate       | Fenoterol                   | Montelukast                     | Tapazol                 |
| Benzylthiouracil   | Fentanilo                   | N-(2-Hydroxyethyl)lorazepam     | Temazepam               |
| Betaxolol          | Florfenicol                 | Naproxen                        | Terbutaline             |
| Bethamethasone     | Fludrocortisone             | Nicotine                        | Thiouracil              |
| Bezafibrate        | Fludrocortisone acetate     | Nifedipine                      | Timolol                 |
| Bisoprolol         | Flumethasone                | N-isopropyl-clenbuterol         | Tiotropio bromuro       |
| Brombuterol        | Flunixin                    | Nitroglicerine                  | Tolfenamic acid         |
| Broom-clenbuterol  | Fluocinolone acetonide      | N-methyl-mapenterol             | Torasemide              |
| Broom-clenproperol | Fluorometholone             | Nordiazepam                     | Tramadol                |
| Broom-mapenterol   | Fluoxetine                  | Noscapine                       | Triamcinolone           |
| Budesonide         | Furosemide                  | Olanzapine                      | Triamcinolone acetonide |
| Buprenorphine      | Furosemide glucuronide      | Omeprazole                      | Tulobuterol             |
| Captopril          | Gabapentina                 | Oxazepam                        | Valsartan               |
| Carbamazepine      | Gemfibrozil                 | Oxprenolol                      | Venlafaxine             |
| Carbamezapine      | Hydrochlorothiazide         | Palaudine/(n-hydroxypapaverine) | Warfarin                |
| Carbuterol         | Hydrocodone                 | Pancuronium                     | Zafirlukast             |
| Carprofen          | Hydroxy-clenbuterol         | Pancuronium Bromide             | Zilpaterol              |
| Chloramphenicol    | Hydroxy-clenhepterol        | Pantoprazol                     |                         |
| AHD                | Dicloxacillin               | Midecamycin                     | Spiramycin II           |
| Albendazole        | Difloxacin                  | Minocycline                     | Spiramycin III          |
| Amikacin           | Dimetridazole               | Monesin                         | Streptomycin            |
| Amoxicillin        | Doxycycline                 | Moxifloxacin                    | Sulfacetamide           |
| AMOZ               | Doxytetracycline            | Nafcilline                      | Sulfachlorpyrazine      |
| Ampicilline        | emamectin B1a               | Nalidixic acid                  | Sulfachlorpyridazine    |
| AOZ                | emamectin B1a benzoate      | Narasin                         | Sulfadiazine            |
| Azaperol           | emamectin B1b               | Naxilinic acid                  | Sulfadimethoxine        |
| Azaperone          | emamectin B1b benzoate      | Nitrofurantoin                  | Sulfadimidine           |
| Azepromazine       | Enoxacin                    | Nitrofurazone                   | Sulfadoxine             |
| Azithromycin (+2)  | Enrofloxacin                | Norfloxacin                     | Sulfaguanidine          |
| Carozolole         | Erythromycin (-H2O)         | Ofloxacin                       | Sulfamerazine           |
| Cefaclor           | Erythromycin A              | Oleandomycin                    | Sulfamethazine          |
| Cefazoline         | Erythromycin B              | Cyclamycin                      | Sulfamethizole          |

|                       |                      |                               |                               |
|-----------------------|----------------------|-------------------------------|-------------------------------|
| Cefoperazone          | Erythromycin C       | Oxacillin                     | Sulfamethoxazole              |
| Cefotaxime            | Ethopabate           | Oxfendazole                   | Sulfamethoxy pyridazine       |
| Cefoxatime            | Febantel             | Oxibendazole                  | Sulfamonometoxine             |
| Ceftazidime (2+)      | Fenbendazole         | Oxonilic acid                 | Sulfanilamide                 |
| Ceftizoxime           | Fleroxacin           | Oxytetracycline               | Sulfapyridine                 |
| Ceftriaxone           | Flubendazole         | Pefloxacin                    | Sulfaquinoxaline              |
| Cephadroxile          | Flumequine           | Penicillin                    | Sulfasalazine                 |
| Cephalexin            | Furaltadone          | Penicillin G                  | Sulfathiazole                 |
| Cephapirin            | Furazolidone         | Penicillin V                  | Sulfisoxazole                 |
| Cephradine            | Gatifloxacin         | Penicillines generic fragment | Sulfonamides generic fragment |
| Chlorpromazine        | Gemifloxacin         | Pipedimico                    | Temafloxacin                  |
| Chlortetracyclin      | Gentamicin           | Piperacillin                  | Tetracycline                  |
| Cinoxacin             | Grepafloxacin        | Pirlimycin                    | Tiamulin                      |
| Ciprofloxacin         | Griseofulvin         | Piromidic acid                | Tilmicosin                    |
| Ciprofloxacin (Met 1) | Halofuginone         | Propionylpromazine            | Tinidazole                    |
| Ciprofloxacin (Met 2) | HMMNI                | Rifampicin                    | Tobramycin                    |
| Ciprofloxacin (Met 3) | Josamycin            | Robenidine                    | Triclabendazole               |
| Ciprofloxacin (Met 4) | Lasalocid            | Ronidazole                    | Trimethoprim                  |
| Ciprofloxacin (Met 5) | Leucomalachite green | Rosoxacin                     | Trovafoxacin                  |
| Clarythromycin        | Levamisole           | Roxythromycin                 | Tylosin A                     |
| Clindamycin           | Lincomycin           | Rufloxacin                    | Tylosin B                     |
| Clopidol              | Lomefloxacin         | Salinomycin                   | Tylosin C                     |
| Cloxacillin           | Maduramicin          | Sarafloxacin                  | Tylosin D                     |
| Danofloxacin          | Malachite green      | SEM                           | Xylazine                      |
| Diaveridine           | Marbofloxacin        | Sparfloxacin                  |                               |
| Diclazuril            | Metronidazole        | Spiramycin I                  |                               |

**C) List of Illicit drugs included.**

|                                  |                       |                                 |                              |
|----------------------------------|-----------------------|---------------------------------|------------------------------|
| 10-Hydroxymorphine               | Cocaine               | LSD                             | Nor LSD / nor-iso-LSD        |
| 11-hydroxy-THC                   | Codeine               | MDA                             | Norbenzoylecgonine           |
| 11-nor-9-carboxy- $\Delta$ 9-THC | Codeine epoxide       | MDEA                            | Norcocaethylene              |
| 14-Hydroxycodine                 | Codeine-6-glucuronide | MDMA                            | Norcocaine                   |
| 2-oxo-3-hydroxyLSD               | Cotinine              | Methadone                       | Norcodeine                   |
| 3-Acetylmorphine                 | Diacetylmorphine      | Methamphetamine                 | Normorphine                  |
| 3'-Hydroxycocaine                | Ecgonidine            | Methylecgonidine                | Normorphine-6-glucuronide    |
| 3-Hydroxyflunitrazepam           | Ecgonine              | Methylecgonine                  | Nortropacocaine              |
| 4-hydroxybutanoate               | Ecgonine methyl ester | m-Hydroxybenzoylecgonine        | Paramorphine                 |
| 6-Acetylmorphine (6-AM)          | EDDP                  | Morphine                        | Paraxanthine                 |
| 7-aminoflunitrazepam             | Ephedrine             | Morphine-3 $\beta$ -glucuronide | PCP                          |
| 7-aminonorflunitrazepam          | Ethylecgonine         | Morphine-6 $\beta$ -glucuronide | Pseudomorphine               |
| Acetylcodeine                    | Ethylen cocaine       | Morphine-7,8-oxide              | Pseudomorphine (C17 alkaoid) |
| Amphetamine                      | Fentanyl              | Morphine-gsh                    | Psicolin                     |
| Benzoylecgonine                  | Flunitrazepam         | N-Benzoylnormethylecgonine      | Speed                        |
| Caffeine                         | GHB                   | N-Demthylflunitrazepam          | THC                          |
| Cinnamoylcocaine                 | Heroin                | N-Hydroxynorcocaine             | THC-glucuronide              |
| Cocaethylene                     | Ketamine              | Nicotine                        |                              |



**D) List of Hormones included.**

|                                                      |                                  |                             |                   |
|------------------------------------------------------|----------------------------------|-----------------------------|-------------------|
| 1,4,6-androstatrien-17-ol-3-one                      | Androstanolone                   | Ethinylestradiol            | Nandrolone        |
| 1,4-androstadiene-3,17-dione                         | Bolandiol                        | Ethisterone                 | Nandrolone        |
| 16B-hydroxyfurazabol                                 | Bolasterone                      | Ethylestrenol               | Norclostebol      |
| 16B-hydroxystanozolol                                | Boldenone                        | Ethynodiol                  | Norclostebol      |
| 17alpha-Trenbolone                                   | Boldenone metabolite             | Ethynloestradiol            | Norethandrolone   |
| 17B-oestradiol                                       | Broparoeostrole                  | Fluoxymesterone             | Norethisterone    |
| 17-hydroxy-progesterone                              | Calusterone                      | Formebolone                 | Norethynodrel     |
| 17-oestradiol                                        | Chlormadinone                    | Formebolone metabolite      | Norprogesterone   |
| 17-Methyl-1.testosterone                             | Chlormadinone acetate            | Gestonorone-caproate        | Norvinisterone    |
| 19-hydroxyandrostenedione                            | Clostebol                        | Gestrinone                  | Oestriol          |
| 19-Nortestosterone                                   | Cyclofenil                       | Hexestrol                   | Oestrone          |
| 1-testosterone                                       | Cyproteron                       | Lynestrol                   | Oxandrolone       |
| 3'-hydroxy-progesterone                              | Danazol                          | Medrogestone                | Oxymesterone      |
| 3'-hydroxystanozolol                                 | Dehydrochloromethyl testosterone | Medroxyprogesterone         | Oxymetholone      |
| 4,6-androstadien-17-ol-3-one                         | Delmadinone acetate              | Medroxyprogesterone acetate | Progesterone      |
| 4,9-androstadien-17-methyl-17-ol-3-one               | DHT                              | Megestrol acetate           | Quinbolone        |
| 4,9-androstadien-17-ol-3-one                         | Dienestrol                       | Melengestrol                | Quinestrol        |
| 4B-hydroxy-progesterone                              | Diethylstilbestrol               | Melengestrol acetate        | Stanozolol        |
| 4-Cl-17a-methyl-androsta-1,4-diene-6b,17b-diol-3-one | Dimethisterone                   | Mestanolone                 | Stenbolone        |
| 4-hydroxystanozolol                                  | DI-norgestrel                    | Mesterolone                 | Taleranol         |
| 4-hydroxytestosterone                                | Drostanolone                     | Mestranol                   | Tamoxifen         |
| 6alpha-hydroxy-androst-4-ene-3,17-dione              | Dydrogesterone                   | Methandienone               | Testosterone      |
| 6b-hydroxymetandienone                               | Epimestrol                       | Metenolone                  | THG               |
| 6b-hydroxytestosterone                               | Epi-nortestosterone              | Methandrol                  | Trenbolone        |
| 6-hydroxy-4-Cl-dehydromethyltestosterone             | Epi-testosterone                 | Methenolone                 | Vinyltestosterone |
| 6-hydroxyandrostenedione                             | Epi-trenbolone                   | Methylestrenolone           | Zearalenone       |
| Algestone acetophenide                               | Estradiol                        | Methyltestosterone          | Zearanol          |
| Allylestrenol                                        | Estriol                          | Methyltrenolone             | Zearalenol        |
| Allyltrenbolone                                      | Estrone                          | Mibolerone                  |                   |

**E) List of Mycotoxins included.**

|                                  |                            |                         |                         |
|----------------------------------|----------------------------|-------------------------|-------------------------|
| 15-Acetoxy-scirpenol             | Beta-Zearalenol            | Ergosine                | Moniliformin Sodium     |
| 15-Acetyldeoxynivalenol          | Chaetoglobosin A           | Ergotamine              | Monoacetoxy-scirpenol   |
| 3-Acetyldeoxynivalenol           | Chanoclavine               | Festuclavine            | Mycophenolic acid       |
| 3alpha-Acetyldiacetoxy-scirpenol | Chetomin                   | Fumitremorgin C         | Neosolaniol             |
| 5-Methoxysterigmatocystin        | Citrinin                   | Fumonisin A1            | Nivalenol               |
| Aflatoxicol I                    | Cytochalasin E             | Fumonisin A2            | Norsolorinic acid       |
| Aflatoxin B1                     | Deepoxy-deoxynivalenol     | Fumonisin B1            | Ochratoxin Alpha        |
| Aflatoxin B2                     | Deoxynivalenol             | Fumonisin B2            | Ochratoxin B            |
| Aflatoxin B2 alpha               | Deoxynivalenol-3-glucoside | Fumonisin B3            | Parasiticol             |
| Aflatoxin G1                     | Diacetoxy-scirpenol        | Fumonisin B4            | Paxilline               |
| Aflatoxin G2                     | Dihydroergosine            | Fusarenon-X             | Penitrem A              |
| Aflatoxin M1                     | Dihydroergotamine          | Gibberallic acid        | Roridin A               |
| Aflatoxin M2                     | Dihydrolysergol            | Gliotoxin               | Scirpentriol            |
| Agroclavine                      | Dihydroxy-sterigmatocystin | Griseofulvin            | Sterigmatocystin        |
| Alpha-ergocryptine               | Elymoclavine               | HT-2 Toxin              | Sulochrin               |
| Alpha-Zearalenol                 | Emodin                     | Hydrolyzed zearalenone  | T-2 Toxin               |
| Altenuene                        | Enniatin A                 | Lysergol                | T-2 Triol               |
| Alternariol                      | Enniatin B                 | Meleagrin               | Tentoxin                |
| alternariol methyl ether         | Ergine                     | Methis-ergide           | Verrucaric acid         |
| Austocystin A                    | Ergocornine                | Methoxysterigmatocystin | Verrucarol              |
| Avenacein Y                      | Ergocristine               | Mevinolin               | Verruculogen            |
| Averufin                         | Ergometrine                | Moniliformin            | Zearalenone             |
| Beauvericin                      | Ergometrinine              | Moniliformin Potassium  | Zearalenone-4-glucoside |

**F) List of Surfactants included.**

|           |           |           |           |
|-----------|-----------|-----------|-----------|
| C11-DEA   | C12-AEO9  | C14-AEO8  | C16-AEO9  |
| C12-AEO10 | C13-DEA   | C14-AEO9  | C18-AEO10 |
| C12-AEO11 | C14-AEO10 | C15-DEA   | C18-AEO3  |
| C12-AEO12 | C14-AEO11 | C16-AEO10 | C18-AEO4  |
| C12-AEO13 | C14-AEO12 | C16-AEO11 | C18-AEO5  |
| C12-AEO14 | C14-AEO13 | C16-AEO12 | C18-AEO6  |
| C12-AEO3  | C14-AEO14 | C16-AEO4  | C18-AEO7  |
| C12-AEO4  | C14-AEO4  | C16-AEO5  | C18-AEO8  |
| C12-AEO5  | C14-AEO5  | C16-AEO6  | C18-AEO9  |
| C12-AEO6  | C14-AEO6  | C16-AEO7  | C7-DEA    |
| C12-AEO7  | C14-AEO7  | C16-AEO8  | C9-DEA    |

**G) List of Dyes included.**

|                     |               |                |
|---------------------|---------------|----------------|
| Brilliant green     | Sudan Black B | Sudan Orange G |
| Butter yellow       | Sudan I       | Sudan Para-red |
| Crystal Violet      | Sudan II      | Sudan Red 7B   |
| Leucocrystal violet | Sudan III     | Sudan Red B    |
| Rhodamine B         | Sudan IV      | Sudan Red G    |

**H) List of UV filters included.**

|        |      |         |
|--------|------|---------|
| 4-MBC  | BP-3 | OC      |
| BM-DBM | IAMC | OD-PABA |

**I) List of Phenols included.**

|                        |                         |          |          |
|------------------------|-------------------------|----------|----------|
| 2,4-dimethylphenol     | 4-chloro-3-methylphenol | Catechol | o-Cresol |
| Chlorophenol           | 4-chlorophenol          | Dinoseb  | p-Cresol |
| 3-methyl-4-nitrophenol | Bisphenol A             | m-Cresol | Phenol   |

SUPPLEMENTARY INFORMATION

Table 4: Analytes included in the post-target and the non-target with theoretical library screening in **negative ESI mode** grouped by compounds family.

**A) List of Pesticides included.**

|                        |                  |                   |                      |
|------------------------|------------------|-------------------|----------------------|
| 2,4-D                  | Chlorsulfuron F1 | Fluroxypyr F2*    | Primisulfuron methyl |
| 2,4-DB                 | Dicamba          | Haloxypop         | Propanil             |
| 6-chloronicotinic acid | Dichlorprop      | Hexaflumuron      | Teflubenzuron        |
| Absidic acid           | Fenazaquin       | Ioxynil           | Terbacil             |
| Acifluorfen            | Fenpropathrin    | MCPA              | Toxaphene            |
| Bentazone              | Fludioxonyl      | Mecoprop          | Triflumuron          |
| Bromacil               | Fludiozonil      | Mestrione         |                      |
| Bromoxynil             | Fluroxypyr       | Oxyfluorfen       |                      |
| Chlorsulfuron          | Fluroxypyr F1    | Pentachlorophenol |                      |

**B) List of Pharmaceuticals included.**

|                               |                |                  |
|-------------------------------|----------------|------------------|
| Acetazolamide                 | Fenoprofen     | Cefuroxime       |
| Acetylsalicylic acid/Aspirine | Furosemide     | Chloramphenicol  |
| Adrafinil                     | Ibuprofen      | Diclazuril       |
| Bendroflumethiazide           | Ketoprofen     | Enrofloxacin     |
| Bezafibrate                   | Mefenamic acid | Flumequine       |
| Clofibric acid                | Naproxen       | Nalidixic acid   |
| Diclofenac                    | Nimesulide     | Nicarbazine      |
| diclofenac sodium salt        | Piroxicam      | Nitrofurantoina  |
| Diflusal                      | Pravastatin    | Oxonilic acid    |
| Digoxin                       | Salicylic acid | Sulfamethoxazole |
| Enalapril                     | Sulfasalazine  |                  |
| Enalaprilat                   | Valsartan      |                  |

**C) List of Illicit drugs included.**

---

|                                   |
|-----------------------------------|
| 4-hydroxybutanoate                |
| 11-nor-9-carboxy- $\Delta^9$ -THC |
| GHB                               |

---

**D) List of Hormones included.**

---

|            |              |            |
|------------|--------------|------------|
| Boldenone  | Progesterone | Trenbolone |
| Estrone    | Testosterone | Zearalenol |
| Nandrolone |              |            |

---

**E) List of Mycotoxins included.**

---

|                  |                   |
|------------------|-------------------|
| Citrinin         | Mycophenolic acid |
| Gibberallic acid | Patulin           |

---

**F) List of Surfactants included.**

---

|          |          |          |           |
|----------|----------|----------|-----------|
| C10-LAS  | C12-LAS  | C14-AE1S | NPEO2-SO4 |
| C11-LAS  | C13-AE1S | C14-AE2S | NPEO3-SO4 |
| C12-AE1S | C13-AE2S | C14-AE3S | NPEO4-SO4 |
| C12-AE2S | C13-AE3S | C14-AE4S | NPEO5-SO4 |
| C12-AE3S | C13-AE4S | C14-AE5S | NPEO6-SO4 |
| C12-AE4S | C13-AE5S | C14-AS   | NPEO7-SO4 |
| C12-AE5S | C13-AE6S | C16-AS   | OP1EC     |
| C12-AE6S | C13-AS   | DHSS     |           |
| C12-AS   | C13-LAS  | NP1EC    |           |

---

**G) List of Dyes included.**

|                    |                    |                  |                  |
|--------------------|--------------------|------------------|------------------|
| Acid blue 1        | Brilliant blue FCF | Metanil Yellow   | Quinoline yellow |
| Acid green 9       | Chrysoine          | Naphtol yellow S | Red 10B          |
| Acid red 52        | Eosine             | New coccine      | Red 2G           |
| Acid violet        | Erythrosine        | Orange I/II/RN   | Rose bengal      |
| Allura Red AC      | Fast green FCF     | Patent blue V    | Sunset Yellow    |
| Amaranth           | Fast Red E         | Phloxine B       | Tartrazine       |
| Amido black 10B    | Fast Yellow AB     | Ponceau 3R       | Uranine          |
| Azorubine          | Green S            | Ponceau 4R       | Yellow 2G        |
| Benzyl violet 4B   | Indigotine         | Ponceau 6R       |                  |
| Brilliant black PN | Martius yellow     | Ponceau SX       |                  |

**H) List of UV filters included.**

|                       |                                  |                                           |
|-----------------------|----------------------------------|-------------------------------------------|
| Benzophenone-1 (BP-1) | PDT                              | 2,2'-dihydroxy-4-methoxy benzophenone     |
| Benzophenone-2 (BP-2) | 4-hydroxybenzophenone (HBP)      | 2,3,4-Trihydroxybenzophenone (THB)        |
| Benzophenone-3 (BP-3) | 4-hydroxybenzophenone (HBP)      | Terephthalylidene dicamphor sulfonic acid |
| Benzophenone-4 (BP-4) | 2-hydroxy-4-methoxy benzophenone | Ethylhexyl salicylate (EHS)               |
| PBSA                  | 2,4-dihydroxy benzophenone (DHB) |                                           |

**I) List of Phenols included.**

|                           |                            |                            |                   |
|---------------------------|----------------------------|----------------------------|-------------------|
| 2,3,4,5-tetrachlorophenol | 2,4-dichlorophenol         | 3,4-dichlorophenol         | 4-octylphenol     |
| 2,3,4,6-tetrachlorophenol | 2,4-dimethylphenol         | 3,5-dichlorophenol         | Bisphenol A       |
| 2,3,4-trichlorophenol     | 2,4-dinitrophenol          | 3,5-dinitrophenol          | Catechol          |
| 2,3,5,6-tetrachlorophenol | 2,5-dichlorophenol         | 3-chlorophenol             | Dinoseb           |
| 2,3,5-trichlorophenol     | 2,6-dichlorophenol         | 3-methyl-4-nitrophenol     | m-Cresol          |
| 2,3,6-trichlorophenol     | 2,6-dinitro-2-methylphenol | 4,6-dinitro-4-methylphenol | o-Cresol          |
| 2,3-dichlorophenol        | 2-chlorophenol             | 4-nonylphenol              | p-Cresol          |
| 2,4,5-trichlorophenol     | 2-nitrophenol              | 4-chloro-3-methylphenol    | Pentachlorophenol |
| 2,4,6-trichlorophenol     | p-nitrophenol              | 4-chlorophenol             | Phenol            |
| 2,4,6-trichlorophenol     | 3,4,5-trichlorophenol      | 4-nitrophenol              |                   |
